# Supplementary material for: Anthropogenic disturbance keeps the coastal seafloor biogeochemistry in a transient state
Source: PubMed Central journal article supplement (PMC5883055; doi:10.1038/s41598-018-23925-y), 2018-04-03
Supplement: 41598_2018_23925_MOESM1_ESM.pdf [file 41598_2018_23925_MOESM1_ESM.pdf]

1                    **Supplementary information to –**  
2                    **‘Anthropogenic disturbance keeps the**  
3                    **coastal seafloor biogeochemistry in a**  
4                    **transient state’**

8                    Sebastiaan van de Velde <sup>1,\*</sup>

9                    Vera Van Lancker <sup>2</sup>

10                    Silvia Hidalgo-Martinez <sup>3</sup>

11                    William M. Berelson <sup>4</sup>

12                    Filip J. R. Meysman <sup>3,1</sup>

15                    <sup>1</sup> Analytical, Environmental and Geo-Chemistry, Vrije Universiteit Brussel, 1050 Brussel,  
16                    Belgium

17                    <sup>2</sup> Royal Belgian Institute of Natural Sciences. Operational Directorate Natural Environment,  
18                    1200 Brussel, Belgium

19                    <sup>3</sup> Ecosystem Management Research Group, Department of Biology, Universiteit Antwerpen,  
20                    2160 Antwerpen, Belgium

21                    <sup>4</sup> Earth Science Department, University of Southern California, CA 90089-0740 Los Angeles,  
22                    USA

25                    \* Corresponding author: [sebastiaan.van.de.velde@vub.be](mailto:sebastiaan.van.de.velde@vub.be) (Tel. +32 2 629 27 16)

27                    **Number of pages: S1 – S29**

28                    **Number of tables: 8**

29                    **Number of figures: 10**

30  
31

## 32 1. Supplementary info - METHODS

### 33 1.1 Solid phase analysis and water content

34 Water content was estimated from the same samples by weighing the empty centrifuge  
35 tubes, the centrifuge tubes filled with wet sediment and the tubes with sediment after freeze  
36 drying. Sediment porosity (volume of pore water per total volume of sediment) was  
37 determined from water content and solid phase density measurements, accounting for the salt  
38 content of the pore water. The solid phase density was determined by adding a known mass of  
39 grinded, freeze-dried sediment to a 100 ml graduated cylinder filled with water and recording  
40 the volume displacement.

41 Freeze-dried sediment samples were analyzed for particulate organic carbon (POC),  
42 particulate inorganic carbon (PIC) and particulate nitrogen (PN) by an Interscience Flash  
43 2000 organic element analyzer. Samples for POC were acidified before analysis with 0.1N  
44 HCl to remove the inorganic carbon, and PIC was subsequently calculated by the difference  
45 between total carbon and POC<sup>1</sup>. Concentrations of POC, PIC and PN are expressed as mass %  
46 of dry sediment.

47 To determine the solid phase content of iron and manganese, freeze-dried sediment  
48 samples were ground to a fine powder for microwave assisted digestion (CEM Mars 5) using  
49 aqua regia as extraction agent (ISO 12914:2012). Subsequently, samples were analysed by  
50 High Resolution - Inductively Coupled Plasma – Mass Spectroscopy (HR-ICP-MS,  
51 ThermoScientific Element 2) after 100x dilution with Milli-Q water. Indium (2.5 ppb)  
52 containing 2% HNO<sub>3</sub> was injected simultaneously with the samples as an internal standard.

### 53 1.2 Diagenetic model formulation

54 The applied reactive transport model is an adaptation of the early diagenetic model used by  
55 van de Velde et al.<sup>2</sup> The mass balance equations are representative for a cohesive marine  
56 sediment without advection and bioturbation<sup>3,4</sup>

$$57 \begin{cases} \varphi \frac{\partial C_i}{\partial t} = \frac{\partial}{\partial z} \left( \varphi D_i \frac{\partial C_i}{\partial z} - \varphi v C_i \right) + \sum_k v_{i,k} R_k \\ (1-\varphi) \frac{\partial S_i}{\partial t} = \frac{\partial}{\partial z} \left( -(1-\varphi) w S_i \right) + \sum_k v_{i,k} R_k \end{cases} \quad [1]$$

58 where  $C_i$  represents the concentration of a solute in the pore water,  $S_i$  is the concentration of  
59 a solid component,  $z$  is the depth into the sediment and  $\varphi$  the porosity.  $R_k$  represents the  
60 reaction rate of the  $k$ -th reaction in the reaction set and  $v_{i,k}$  denotes the stoichiometric

61 coefficient of the *i*-th species in the *k*-th reaction. In this model, only 2 transport processes are  
62 included (characteristic for a non-permeable sediment without macro-fauna): (i) solute  
63 diffusion in the pore water, by Fick's first law<sup>5</sup> (diffusion coefficient  $D_i$ )  
64 and (ii) downward advection due to sediment accumulation (advective velocities *v* and *w*).  
65 where the flux is represented

$$66 \quad J_D = -\phi D_i \frac{\partial C}{\partial z} + \phi v C \quad [2]$$

67 The reactive transport model includes 13 state variables in total; fast degradable organic  
68 matter [CH<sub>2</sub>O]<sub>f</sub>, manganese oxide [MnO<sub>2</sub>], iron (oxyhydr)oxide [FeOOH], iron sulphide  
69 [FeS], manganese carbonate [MnCO<sub>3</sub>], dissolved inorganic carbon [HCO<sub>3</sub><sup>-</sup>], ammonium  
70 [NH<sub>4</sub><sup>+</sup>], oxygen [O<sub>2</sub>], sulphate [SO<sub>4</sub><sup>2-</sup>], reduced manganese [Mn<sup>2+</sup>], reduced iron [Fe<sup>2+</sup>],  
71 sulphide [HS<sup>-</sup>] and methane [CH<sub>4</sub>]. Slowly degradable and refractory fractions of organic  
72 carbon are not modelled explicitly because previous field studies have shown that the organic  
73 carbon content of the field site does not vary appreciably over the time scale of several  
74 months<sup>6,7</sup>. The exclusion of these fractions considerably decreases model calculation time.

75 The solution procedure has been described previously<sup>2,8</sup>, but in short, the open-source  
76 programming language R was used to implement a numerical solution procedure for the  
77 partial differential equations (Eq. [1]) by applying the method-of-lines<sup>9</sup> using the R packages  
78 CRAN:ReacTran<sup>8</sup> and CRAN:deSolve<sup>10</sup>. The sediment grid was generated by dividing the  
79 sediment domain (30 cm thickness) into an uneven grid of 400 layers with the thickness of the  
80 first layer being 0.0075 cm and the thickness of the other layers increasing with a factor  
81 1.009.

## 82 **Biogeochemical reaction set**

83 The aim of the model simulations was to reproduce the disturbance event between May  
84 and June 2014, in order to estimate how organic matter mineralisation pathways evolve  
85 through time. The reaction set included (n=14) was tailored to this (Table S2).

86 Organic matter consists of three fractions; fast degradable organic matter ( $OC_f$ ), slow  
87 degradable organic matter ( $OC_s$ ) and refractory organic matter ( $OC_r$ ). Refractory organic  
88 matter is considered to be conservative, i.e. it is not degraded over the time scale of the  
89 model. For the two other fractions, five mineralization pathways are included: aerobic  
90 respiration (AR), manganese reduction (MR), dissimilatory iron reduction (DIR), sulphate  
91 reduction (SR) and methanogenesis (MG). Denitrification is not included, as this is generally  
92 a negligible mineralization pathway<sup>11</sup>, and measured rates are  $< 4 \mu\text{mol N m}^{-2} \text{d}^{-1}$  in the North

93 Sea<sup>12</sup>. The sequential usage of electron acceptors is based on thermodynamic free energy gain  
94 (AR > MR > DIR ≈ SR > MG) and implemented via the conventional limitation-inhibition  
95 formulation<sup>13</sup> (Table A 2). We did not include sulphate reduction inhibition by iron oxides, as  
96 recent studies have shown that both sulphate reduction and dissimilatory iron reduction can  
97 proceed simultaneously<sup>2,14</sup>.

98 Oxidation of organic matter produces dissolved inorganic carbon (modelled as HCO<sub>3</sub><sup>-</sup>) and  
99 ammonium (NH<sub>4</sub><sup>+</sup>). Ammonium can subsequently adsorb onto solid phase particles<sup>15</sup> ( $K_{ads}^{NH_4^+}$   
100 = 1.75 cm<sup>3</sup> g<sup>-1</sup>). The reduction of manganese oxides releases dissolved manganese (Mn<sup>2+</sup>)  
101 which can adsorb onto solid phase particles<sup>16</sup> ( $K_{ads}^{Mn^{2+}} = 30$  cm<sup>3</sup> g<sup>-1</sup>), or precipitate as  
102 manganese carbonate<sup>16,17</sup>. Aerobic manganese oxidation and aerobic ammonium oxidation  
103 were not included, as these process are generally slow<sup>11</sup> and will be of minor importance for  
104 the purpose of the model. In a similar fashion, DIR releases ferrous iron (Fe<sup>2+</sup>), which can (i)  
105 adsorb onto solid phase particles<sup>16,18</sup>, (ii) become reoxidised by oxygen, or (iii) precipitate as  
106 iron sulphide. Sulphate reduction produces free sulphide, which can be (i) reoxidised by  
107 oxygen (ii) reoxidised by iron (oxyhydr)oxides or (iii) precipitate as iron sulphide.  
108 Methanogenesis produces methane (CH<sub>4</sub>) which can be oxidised by oxygen, iron oxides or  
109 sulphate (Table S2).

110 The adsorption of Fe<sup>2+</sup>, NH<sub>4</sub><sup>+</sup>, Mn<sup>2+</sup> are included as a reversible, linear adsorption process  
111 (Table S2), where the concentration of the adsorbed species is in equilibrium at all times with  
112 the surrounding pore water, e.g.,  $[X \equiv Fe^{2+}] = K_{ads}^{Fe^{2+}} [Fe^{2+}]$ , where  $K_{ads}^{Fe^{2+}}$  is the adsorption  
113 constant (in cm<sup>3</sup> g<sup>-1</sup>). This equilibrium formulation essentially assumes that adsorption  
114 proceeds much faster than the kinetics of the other reactions<sup>16</sup>.

115 The kinetic rate expressions of all secondary redox reactions are described by standard  
116 second-order rate laws<sup>3</sup>. The kinetics of dissolution and precipitation of FeS and MnCO<sub>3</sub> also  
117 follow the standard rate laws, where the reaction rates are dependent on the pore water  
118 saturation state<sup>17,19</sup> (Table S3). The pH of the pore water is a controlling factor in the  
119 precipitation of FeS, but it is not explicitly modelled, in order to reduce model complexity.  
120 Instead, a constant depth profile with pH = 7.5 was adopted.

121

## 122 **Model parametrisation**

123 All kinetic parameters were taken from previous model studies and experimental  
124 studies<sup>2,16,17,19–24</sup> (Table S4). Upper boundary conditions for the solutes were set to a fixed  
125 concentration, based on the values measured in this and previous field campaigns<sup>7</sup> (Table S5).  
126 Upper boundary conditions for the solids were all set at a zero input flux, assuming that there  
127 was no input of iron and manganese oxides during the period of recovery (which is a  
128 reasonable assumption, considering the absence of iron and manganese oxides during the  
129 preceding months<sup>7</sup>). Bottom boundary conditions for all state variables were set at zero  
130 gradients.

131 Two types of model simulation were carried: (1) a steady state simulation describing the  
132 steady situation before the disturbance event and (2) transient simulation that describe the  
133 development of the sediment chemistry after the disturbance event. Table S4 shows the  
134 overview of all parameters as used in the steady-state simulation (the month May). For the  
135 dynamic model simulation after the disturbance event (months June, July, September) one  
136 needs to consider that in reality, adsorption is not instantaneous. It is a dynamic process and  
137 not much is known about the dynamics of reversible adsorption in natural systems. Therefore,  
138 there is a lot of uncertainty on the rates of adsorption. Rather than modelling adsorption  
139 dynamically (which immensely increases model calculation time) we have reduced the  
140 equilibrium constants of ammonium, manganese and iron, which partially accounts for the  
141 dynamics of adsorption (slower adsorption leads to less adsorbed species vs dissolved species,  
142 which is essentially equivalent to a lower saturation constant). The steady-state simulation  
143 was run with the K-values given in Table S4, while for the dynamic simulation run, K-values  
144 were set at  $1.75 \text{ cm}^3 \text{ g}^{-1}$ ,  $5 \text{ cm}^3 \text{ g}^{-1}$  and  $10 \text{ cm}^3 \text{ g}^{-1}$  for adsorbed ammonium, manganese and  
145 iron, respectively.

## 146 **Steady state simulation**

147 In a first step, the model was allowed to reach a steady state with (i) no iron and  
148 manganese oxides (ii) no fast degradable organic carbon (which is only brought in during the  
149 disturbance event) and (iii) a fixed concentration depth profile of (slow degradable and  
150 refractory) organic carbon of 2%. The fraction of slow degradable vs refractory organic  
151 matter was tuned to the DIC and  $\text{SO}_4^{2-}$  profiles. The adsorption coefficient and the C:N ratio  
152 of organic matter were tuned to the  $\text{NH}_4^+$  profile. Resulting model profiles are represented in  
153 Figure A 1. Important to note is that this site is dominated by the electrogenic sulphur  
154 oxidation (e-SOx). This process was not included in the biogeochemical model, because (i) it

155 has little impact on the partitioning of the OMM pathways<sup>7,25</sup> and (ii) the understanding of e-  
156 SOx is limited to its steady state effect on sediment geochemistry, while the dynamics are still  
157 largely unknown<sup>22</sup>. The main effect of e-SOx on the sediment geochemistry is the strong  
158 release of Fe and Mn in the pore water due to the dissolution of sulphides and carbonates<sup>26</sup>. It  
159 has been shown at this field site that the release in the pore water of Fe and Mn is solely the  
160 result of e-SOx<sup>7</sup>, and since e-SOx is not included in the model, no release of iron and  
161 manganese is witnessed in the pore water.

## 162 **Dynamic simulation**

163 In a second step, a disturbance was introduced. Figure 2a in the main text provides a  
164 schematic representation of the two scenarios: (1) a homogenisation of the upper 15 cm of  
165 sediment by trawling or (2) the deposition of a new layer of 15 cm on top of the sediment by  
166 dredging (see section 2 for details). The initial state before the disturbance was defined by  
167 modelled steady state profiles of DIC, NH<sub>4</sub><sup>+</sup> and SO<sub>4</sub><sup>2-</sup>, together with measured pore water  
168 profiles of dissolved Fe and Mn in May 2014. In the trawling scenario, the upper 15 cm of the  
169 model domain were modified as follows: (i) the profiles of DIC, NH<sub>4</sub><sup>+</sup>, PO<sub>4</sub><sup>3-</sup> and SO<sub>4</sub><sup>2-</sup> were  
170 set to their overlying water values (Table S5), (ii) the concentration of reduced species (dFe,  
171 dMn) were set to zero, simulating oxidation in the overlying water (iii) fast degradable  
172 organic carbon, iron and manganese oxides were newly introduced. In the dredging scenario,  
173 a new layer of 15 cm was added to the model domain, and this zone was treated as above. The  
174 only difference is thus the lower 15 cm of the modelled domain, where in scenario 1 the  
175 concentration profiles of the lower 15 cm of the steady state were taken, and in scenario 2 the  
176 upper 15 cm of the steady state. The model then calculated the transient evolution over the  
177 course of 78 days (which is equivalent with the evolution from June to September 2014). The  
178 amount of reactive organic carbon, iron and manganese oxides that was newly introduced was  
179 tuned to match the observed evolution of DIC, NH<sub>4</sub><sup>+</sup> (for the amount of reactive organic  
180 carbon) and dMn and dFe (for the amount of iron and manganese oxides).

181

## 182 **2. Supplementary results**

### 183 **2.1 Sediment coloration**

184 During sampling campaigns in spring (January, March and May 2014) the sediment  
185 appearance and coloration was described as clayish, with a dark grey colour and the  
186 occasional appearance of a millimetre thick sand layer<sup>7</sup> (Figure S3a). In contrast, the cores  
187 sampled in June 2014 (this campaign) were light brown in colour. In the following months,  
188 the sediment gradually changed colour, from brown to grey, and in September, the colour was  
189 similar to the months before June. The change in sediment coloration suggests that the  
190 overlying layer is first oxidised (the loss of the dark colour is possibly through the oxidation  
191 or loss of FeS minerals, while the brown colour is typical for Manganese oxides<sup>2</sup>) and then  
192 reduced over time (regaining of the compactness and dark colour).

### 193 **2.2 Cohesiveness and porosity**

194 The gravity corer in June penetrated much deeper in the sediment (up to 24 cm, as  
195 compared to 15 cm in May, Figure 1 in the main text), indicating that the sediment was less  
196 compact (Figure S3b). Over time, the penetration decreased again to ~15 cm.

197 The porosity profile in May showed scatter around a mean value of 0.79 in the upper few  
198 centimetres and decreased with depth from a maximum value of 0.82 to ~0.70 at a depth of 15  
199 cm. In June, the porosity profile started at the same value at the sediment water interface  
200 (0.82), but remained constant at a value of 0.78 between 1 cm and 15 cm, and then decreased  
201 to a 0.68 at 24 cm. This suggests that the upper 15 cm of the sediment column in June was  
202 freshly deposited (without compaction) or thoroughly mixed. In July, porosity was higher at  
203 the SWI (~0.91) and decreased rapidly to 0.75, after which it recovered to 0.80. Below 11 cm  
204 it decreased to ~0.70. Possibly, the upper layer compacted between June and July, while the  
205 rest compacted between July and September, when the porosity profiles again resembled  
206 those of May (before the disturbance event), with some scatter and a decrease from ~0.85 to  
207 ~0.70 at a depth of 15 cm (Figure S8).

### 208 **2.3 Elemental composition of solid phase sediment**

209 Bottom trawling and sediment deposition after dredging may affect the elemental  
210 composition of the solid phase in a different way. In the case of bottom trawling, local  
211 sediment is resuspended, and deposited as a mixed layer. Hence one expects the upper mixed  
212 layer to be similar in the upper disturbed layer and the underlying undisturbed layer. In the  
213 case of deposition of dredged sediment, another type of sediment could be deposited, which  
214 may have a different chemical composition.

215 Figure A 6 shows the solid phase concentrations of particulate organic carbon (POC),  
216 particulate inorganic carbon (PIC), particulate nitrogen (PN) and aqua regia extractable iron  
217 and manganese, averaged per 5 cm interval and for two replicate cores. The mean values and  
218 standard deviations are presented in Table A5. The concentrations in the 5 cm layer in June  
219 were consistently higher than in May, for POC (~0.7%), PN (~0.11%), extractable Fe (~110  
220  $\mu\text{mol g}^{-1}$ ) and extractable Mn (~5  $\mu\text{mol g}^{-1}$ ). In contrast, PIC was constant for all layers and  
221 for all months (Figure S9). However, the standard deviations are relatively big when  
222 compared to these differences. To check whether there was a statistically significant  
223 difference between the different months, a standard two-way ANOVA with replicate was  
224 performed with month and depth interval as factors (significance level  $p = 0.05$ ). The only  
225 significant difference was found for PIC ( $p = 0.03$ , Table A 7). This suggests that most of the  
226 difference between June and May can be explained by spatial variability, rather than different  
227 sediment characteristics.

228 Similarly, trace metal concentrations (As, Cd, Cr, Cu, Pb, Ni and Zn; aqua regia  
229 extractable) is given in Figure S10 (mean values and standard deviations in Table S6). If the  
230 layer was a deposition of dredged sediment originating from navigation channels and/or  
231 harbours, one would expect that the solid phase of the sediment shows similar characteristics  
232 as the sediment in the harbour zones. Therefore, the trace metal content of the dredged  
233 material from the harbours in the Belgian Coastal Zone (dashed and filled line in Figure S10  
234 and second and third column Table S7) are given as a reference for the measured  
235 concentrations. As for the major element concentrations, a two-way ANOVA was used to  
236 evaluate the apparent differences in trace metal content. Only lead and arsenic gave a  
237 significant result (Table S8). This shows as well that the high value in June is most likely not  
238 because of different sediment characteristics.

239  
240  
241  
242  
243  
244  
245  
246  
247  
248



249

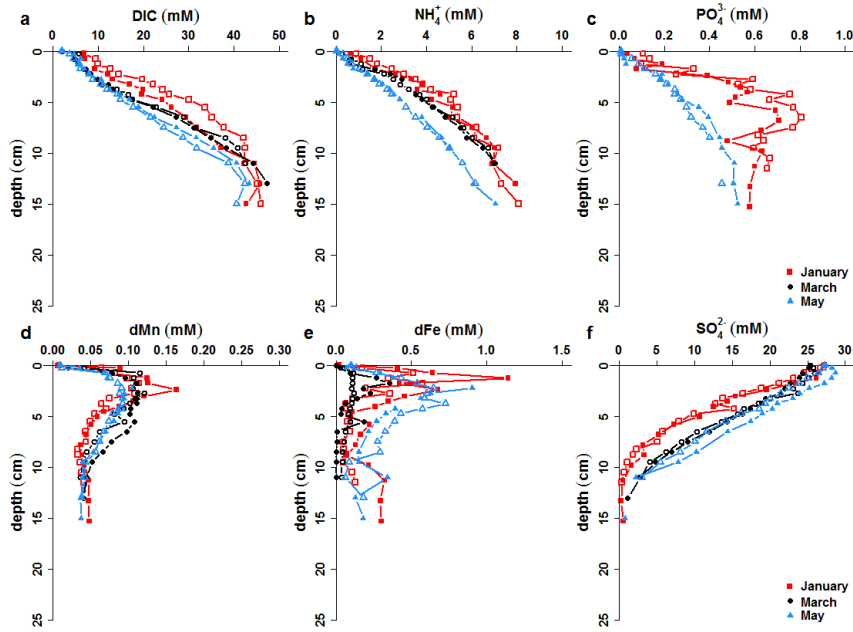

250

251 **Figure S1: Pore water profiles of three months in the period before the disturbance: January 2014 (red), March 2014**  
252 **(black) and May 2014 (blue). (a) dissolved inorganic carbon (DIC), (b) ammonium ( $\text{NH}_4^+$ ), (c) phosphate ( $\text{PO}_4^{3-}$ ), (d)**  
253 **dissolved manganese (dMn), (e) dissolved iron (dFe) and (f) sulphate ( $\text{SO}_4^{2-}$ ).**

254

255

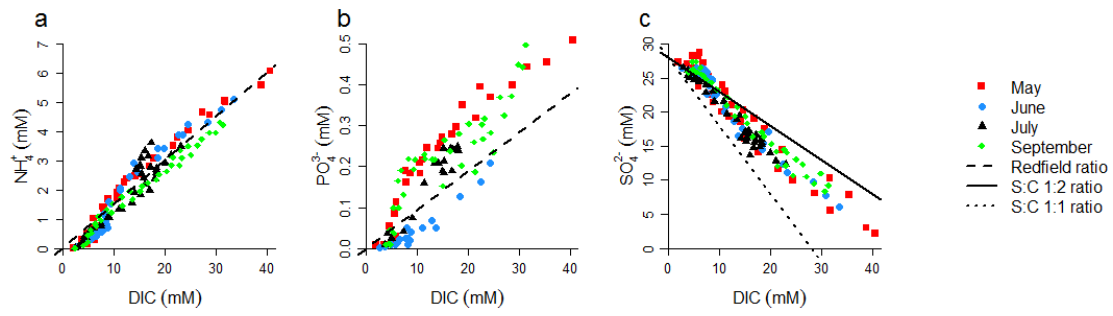

256

257 **Figure S2: Correlations between the pore water concentrations of Dissolved Inorganic Carbon (DIC) and (a)**  
 258 **ammonium ( $\text{NH}_4^+$ ), (b) phosphate ( $\text{PO}_4^{3-}$ ) and (c) sulphate ( $\text{SO}_4^{2-}$ ) for the months May, June, July and September. The**  
 259 **black dashed line in panel (a) and (b) indicates the Redfield ratio (C:N:P = 106:16:1), the black solid line in (c) shows**  
 260 **the stoichiometric 1:2 (S:C) ratio for sulphate reduction and the black dotted line shows the stoichiometric 1:1 (S:C)**  
 261 **ratio for anaerobic oxidation of methane.**  
 262

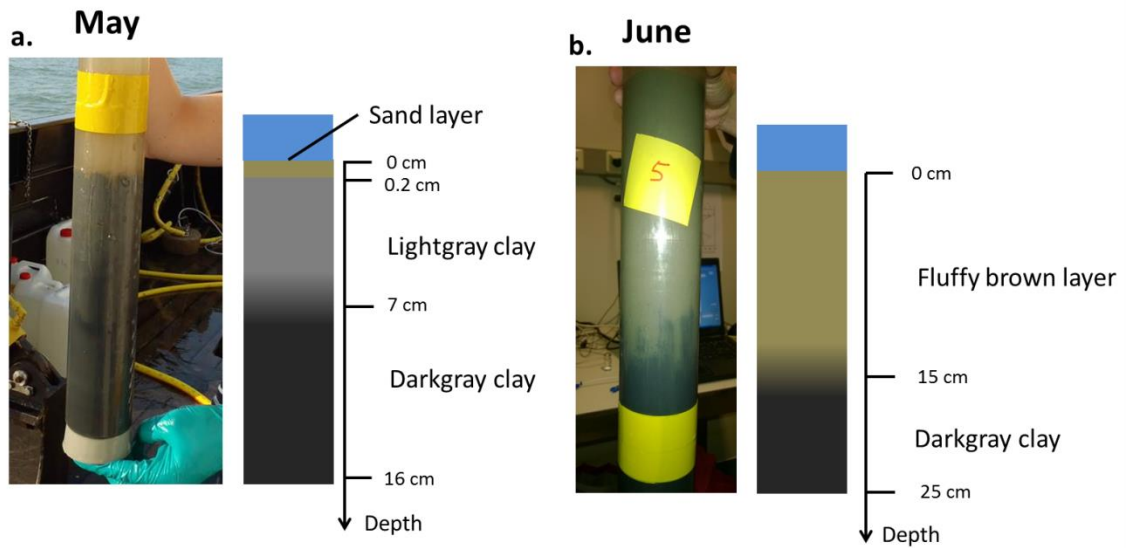

263

264 **Figure S3: Photographic images of sediment cores immediately after core collection and a schematic description of the**  
 265 **downward colour changes in the sediment. (a) May 2014, right before the disturbance event. The oxidized brownish**  
 266 **layer is limited to the upper ~0.2 cm. (b) June 2014, after the disturbance event. The oxidized brownish layer now**  
 267 **reaches down to ~16 cm. Note also the difference in core length. In May 2014, sediment cores collected were only**  
 268 **~16cm, while in June 2014, the gravity corer penetrated much deeper, and sediment cores collected were ~25cm.**  
 269

270

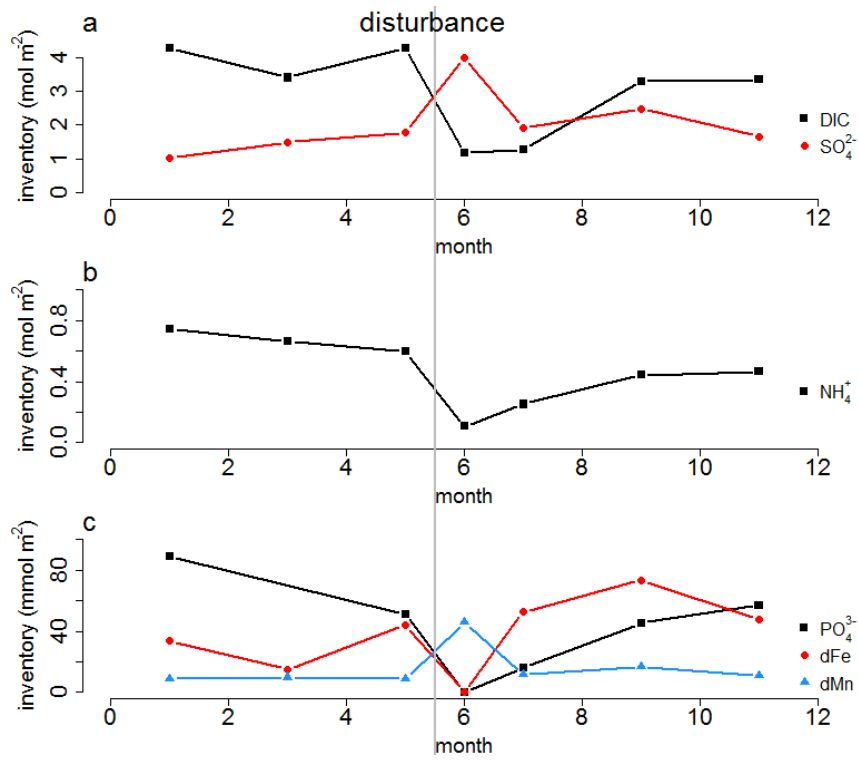

271

272 **Figure S4: Evolution of the pore water inventories across 2014 (see Table S1 for exact values). Grey line indicates**  
273 **when the disturbance occurred. (a) Dissolved inorganic carbon (DIC) and sulphate (SO<sub>4</sub><sup>2-</sup>), (b) ammonium (NH<sub>4</sub><sup>+</sup>), (c)**  
274 **phosphate (PO<sub>4</sub><sup>3-</sup>), dissolved iron (dFe) and dissolved manganese (dMn).**

275

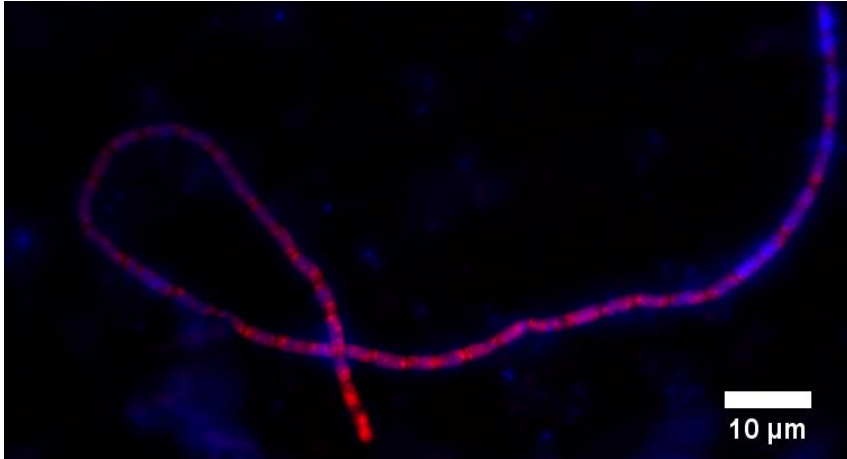

276

277 **Figure S5: image obtained by Fluorescence In Situ Hybridization (probe DSB706) of a cable bacteria fragment from**  
278 **the September cores at the field site, providing evidence for the recolonization of cable bacteria. See ref. [25] for more**  
279 **information on the sampling procedure.**

280



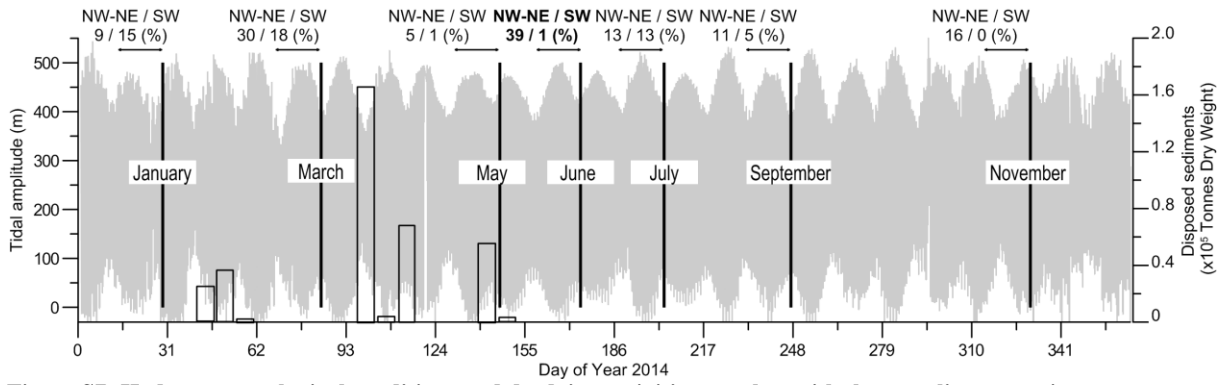

290  
291  
292  
293  
294  
295  
296  
297

**Figure S7: Hydro-meteorological conditions and dredging activities together with the sampling campaigns.**  
**Background (grey) is the tidal amplitude (m) showing the Spring-Neap tidal cycles throughout 2014. Significant wave height of > 1 m is given in frequency of occurrence (%) for the sectors NW-NE and SW, and is calculated over a 14-days period prior to the sampling. Dredged material was disposed at a disposal ground nearby, mostly in Spring (bars).**

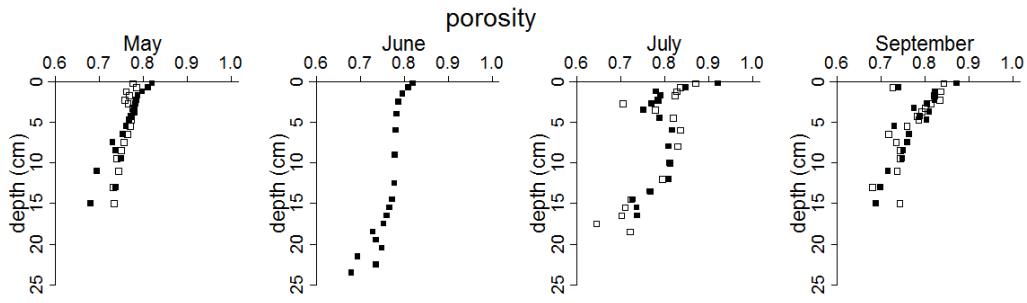

298

299 **Figure S8: Porosity from duplicate cores from May, June, July and September 2014. In June only 1 core was**  
 300 **measured for porosity.**

301



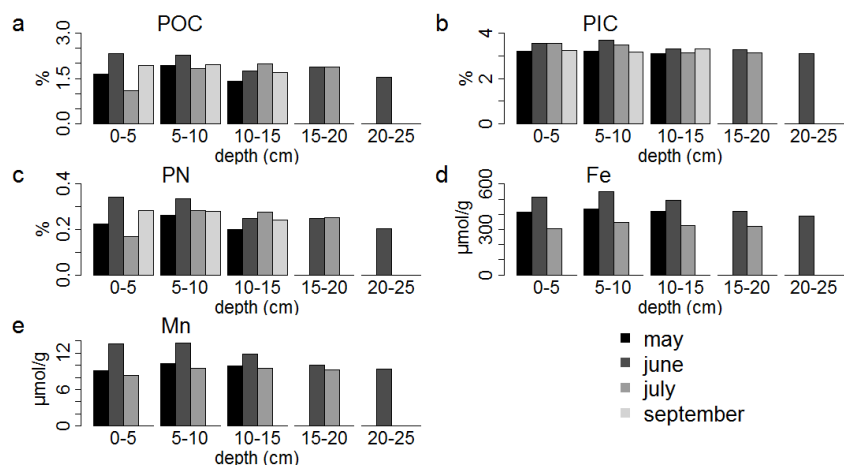

302

303 **Figure S9: Comparison of the average elemental composition of the sediment cores. The content is averaged over 5 cm**  
 304 **intervals. Concentrations of (a) POC, (b) PIC and (c) PN are in mass-%, concentrations of (d) aqua regia extractable**  
 305 **Fe and (e) Mn are in  $\mu\text{mol g}^{-1}$ . Fe and Mn content were not measured in September.**

306

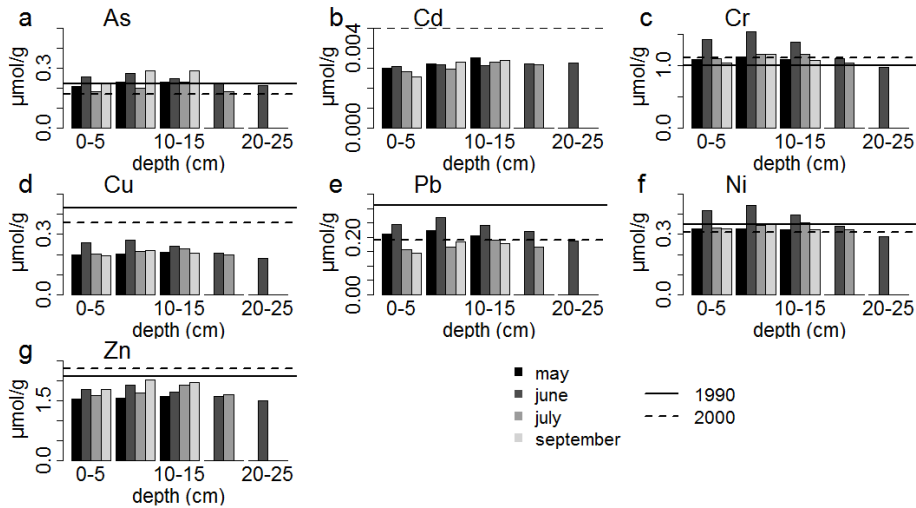

307

308 **Figure S10: Comparison of the average aqua regia extractable trace metal content of the sediment cores. (a) As, (b)**  
 309 **Cd, (c) Cr, (d) Cu, (e) Pb, (f) Ni and (Zn). The dashed line is the mean trace element content in dredged sediment from**  
 310 **the Oostende harbour in 2000, the full line in 1990 ([http://www.mumm.ac.be/NL/Management/Sea-](http://www.mumm.ac.be/NL/Management/Sea-based/dredging.php)**  
 311 **based/dredging.php). The Cd concentration in 1990 was much higher than the measured concentration in our samples**  
 312 **(0.022  $\mu\text{mol g}^{-1}$ ). The content is averaged over 5 cm intervals. Concentrations are in  $\mu\text{mol g}^{-1}$ . In September only 1**  
 313 **core was measured for As.**  
 314

| <b>solute</b>                 | <b>month</b> | <b>inventory<br/>(mmol m<sup>-2</sup>)</b> | <b>solute</b>                 | <b>month</b> | <b>inventory<br/>(mmol m<sup>-2</sup>)</b> |
|-------------------------------|--------------|--------------------------------------------|-------------------------------|--------------|--------------------------------------------|
| DIC                           | January      | 4263                                       | dMn                           | January      | 8.9                                        |
|                               | March        | 3394                                       |                               | March        | 9.8                                        |
|                               | May          | 4276                                       |                               | May          | 8.9                                        |
|                               | June         | 1190                                       |                               | June         | 46                                         |
|                               | July         | 1281                                       |                               | July         | 12                                         |
|                               | September    | 3289                                       |                               | September    | 17                                         |
|                               | November     | 3348                                       |                               | November     | 11                                         |
| NH <sub>4</sub> <sup>+</sup>  | January      | 743                                        | dFe                           | January      | 34                                         |
|                               | March        | 663                                        |                               | March        | 15                                         |
|                               | May          | 595                                        |                               | May          | 44                                         |
|                               | June         | 105                                        |                               | June         | 0.07                                       |
|                               | July         | 251                                        |                               | July         | 53                                         |
|                               | September    | 442                                        |                               | September    | 74                                         |
|                               | November     | 464                                        |                               | November     | 48                                         |
| PO <sub>4</sub> <sup>3-</sup> | January      | 89                                         | SO <sub>4</sub> <sup>2-</sup> | January      | 1039                                       |
|                               | March        | NA                                         |                               | March        | 1490                                       |
|                               | May          | 51                                         |                               | May          | 1784                                       |
|                               | June         | 0.015                                      |                               | June         | 3982                                       |
|                               | July         | 16                                         |                               | July         | 1907                                       |
|                               | September    | 45                                         |                               | September    | 2482                                       |
|                               | November     | 57                                         |                               | November     | 1659                                       |

315  $\sum_{i=1}^{x_{depth}} \Delta x_{slice}$  evolution of the pore water inventories of the 16 top cm for the different analytes. Inventory is calculated as

316  $\sum_{i=1}^{x_{SWI}} \Delta x_{slice}$  .

317

| <i>Primary redox reactions</i>          |                                     |        |                                                                                                                                                                 |
|-----------------------------------------|-------------------------------------|--------|-----------------------------------------------------------------------------------------------------------------------------------------------------------------|
| R1                                      | Aerobic respiration                 | ARs    | $\{CH_2O.(NH_3)_{1/R_{CN}}\}_s + O_2 \rightarrow HCO_3^- + \frac{1}{R_{CN}} NH_4^+ + \frac{R_{CN}-1}{R_{CN}} H^+$                                               |
| R2                                      | Manganese reduction                 | MRs    | $\{CH_2O.(NH_3)_{1/R_{CN}}\}_s + 2MnO_2 + \frac{3R_{CN}+1}{R_{CN}} H^+ \rightarrow HCO_3^- + \frac{1}{R_{CN}} NH_4^+ + 2Mn^{2+} + 2H_2O$                        |
| R3                                      | Dissimilatory iron reduction        | DIRs   | $\{CH_2O.(NH_3)_{1/R_{CN}}\}_s + 4FeOOH + \frac{7R_{CN}+1}{R_{CN}} H^+ \rightarrow HCO_3^- + \frac{1}{R_{CN}} NH_4^+ + 4Fe^{2+} + 6H_2O$                        |
| R4                                      | Sulphate reduction                  | SRs    | $\{CH_2O.(NH_3)_{1/R_{CN}}\}_s + \frac{1}{2} SO_4^{2-} \rightarrow HCO_3^- + \frac{1}{R_{CN}} NH_4^+ + \frac{1}{2} HS^- + \frac{R_{CN}-2}{2R_{CN}} H^+$         |
| R5                                      | methanogenesis                      | MGs    | $\{CH_2O.(NH_3)_{1/R_{CN}}\}_s + \frac{3R_{CN}+2}{2R_{CN}} H^+ \rightarrow \frac{1}{2} HCO_3^- + \frac{1}{R_{CN}} NH_4^+ + \frac{1}{2} CH_4 + \frac{1}{2} H_2O$ |
| <i>Secondary redox reactions</i>        |                                     |        |                                                                                                                                                                 |
| R6                                      | Ferrous iron oxidation              | FIO    | $4Fe^{2+} + O_2 + 6H_2O \rightarrow 4FeOOH + 8H^+$                                                                                                              |
| R7                                      | Sorbed ferrous iron oxidation       | SIO    | $4X \equiv Fe^{2+} + O_2 + 6H_2O \rightarrow 4FeOOH + 8H^+$                                                                                                     |
| R8                                      | Canonical sulphur oxidation         | CSO    | $HS^- + 2O_2 \rightarrow SO_4^{2-} + H^+$                                                                                                                       |
| R9                                      | Sulphide-mediated iron reduction    | SIR    | $HS^- + 8FeOOH + 15H^+ \rightarrow SO_4^{2-} + 8Fe^{2+} + 12H_2O$                                                                                               |
| R10                                     | Aerobic methane oxidation           | ArMO   | $CH_4 + 2O_2 \rightarrow CO_2 + 2H_2O$                                                                                                                          |
| R11                                     | Fe mediated methane oxidation       | Fe-AMO | $CH_4 + 8FeOOH + 16H^+ \rightarrow CO_2 + 8Fe^{2+} + 14H_2O$                                                                                                    |
| R12                                     | Sulphate mediated methane oxidation | S-AMO  | $CH_4 + SO_4^{2-} + H^+ \rightarrow CO_2 + HS^- + 2H_2O$                                                                                                        |
| <i>Sorption/precipitation reactions</i> |                                     |        |                                                                                                                                                                 |
| R13                                     | Iron sulphide precipitation         | ISP    | $Fe^{2+} + HS^- \rightarrow FeS + H^+$                                                                                                                          |
| R14                                     | Iron sulphide dissolution           | ISD    | $FeS + H^+ \rightarrow Fe^{2+} + HS^-$                                                                                                                          |
| R15                                     | Manganese carbonate precipitation   | MCP    | $Mn^{2+} + HCO_3^- \rightarrow MnCO_3 + H^+$                                                                                                                    |
| R16                                     | Manganese carbonate dissolution     | MCD    | $MnCO_3 + H^+ \rightarrow Mn^{2+} + HCO_3^-$                                                                                                                    |
| R17                                     | Ammonium sorption                   | AMS    | $NH_4^+ \leftrightarrow X \equiv NH_4^+$                                                                                                                        |
| R18                                     | Manganese sorption                  | MnS    | $Mn^{2+} \leftrightarrow X \equiv Mn^{2+}$                                                                                                                      |
| R14                                     | Ferrous iron sorption               | FIS    | $Fe^{2+} \leftrightarrow X \equiv Fe^{2+}$                                                                                                                      |

318 **Table S2** List of biogeochemical reactions included in the reactive transport model. A distinction is made between  
319 mineralization reactions of organic matter (“Primary redox reactions”), the subsequent reoxidation of mineralization  
320 products (“Secondary redox reactions), and sorption and precipitation reactions (“Sorption/precipitation reactions”).  
321 The associated kinetic expressions are listed in Table 3. For the primary redox reactions only the reactions for  
322 slow degradable organic matter (CH<sub>2</sub>O<sub>s</sub>) are given. The reactions for fast degradable organic matter are identical.  
323

| Reaction                                               | Kinetic rate expression                                                                                                                                                    |
|--------------------------------------------------------|----------------------------------------------------------------------------------------------------------------------------------------------------------------------------|
| M1 Mineralization fast organic matter ( $R_{\min}^f$ ) | $(1-\varphi)k_f [CH_2O_f]$                                                                                                                                                 |
| M2 Mineralization slow organic matter ( $R_{\min}^s$ ) | $(1-\varphi)k_s [CH_2O_s]$                                                                                                                                                 |
| R1 Aerobic respiration                                 | $\frac{[O_2]}{[O_2] + K_{O_2}} R_{\min}^s$                                                                                                                                 |
| R2 Manganese reduction                                 | $\frac{[MnO_2]}{[MnO_2] + K_{MnO_2}} \frac{K_{O_2}}{[O_2] + K_{O_2}} R_{\min}^s$                                                                                           |
| R3 Dissimilatory iron reduction                        | $\frac{[FeOOH]}{[FeOOH] + K_{FeOOH}} \frac{K_{O_2}}{[O_2] + K_{O_2}} \frac{K_{MnO_2}}{[MnO_2] + K_{MnO_2}} R_{\min}^s$                                                     |
| R5 Sulphate reduction                                  | $\frac{[SO_4^{2-}]}{[SO_4^{2-}] + K_{SO_4^{2-}}} \frac{K_{O_2}}{[O_2] + K_{O_2}} \frac{K_{MnO_2}}{[MnO_2] + K_{MnO_2}} R_{\min}^s$                                         |
| R7 Methanogenesis                                      | $\frac{K_{SO_4^{2-}}}{[SO_4^{2-}] + K_{SO_4^{2-}}} \frac{K_{FeOOH}}{[FeOOH] + K_{FeOOH}} \frac{K_{MnO_2}}{[MnO_2] + K_{MnO_2}} \frac{K_{O_2}}{[O_2] + K_{O_2}} R_{\min}^f$ |
| R8 Ferrous iron oxidation                              | $\varphi k_{FIO} [O_2] [Fe^{2+}]$                                                                                                                                          |
| R7 Sorbed ferrous iron oxidation                       | $(1-\varphi)k_{SIO} [O_2] [X \equiv Fe^{2+}]$                                                                                                                              |
| R8 Canonical sulphur oxidation                         | $\varphi k_{CSO} [O_2] [HS^-]$                                                                                                                                             |
| R9 Sulphide-mediated iron reduction                    | $(1-\varphi)k_{SIR} [FeOOH] [HS^-]$                                                                                                                                        |
| R10 Aerobic methane oxidation                          | $\varphi k_{ArMO} [O_2] [CH_4]$                                                                                                                                            |
| R11 Iron mediated methane oxidation                    | $(1-\varphi)k_{Fe-AMO} [FeOOH] [CH_4]$                                                                                                                                     |
| R12 Sulphate mediated methane oxidation                | $\varphi k_{S-AMO} [SO_4^{2-}] [CH_4]$                                                                                                                                     |
| R13 Iron sulphide precipitation                        | $(1-\varphi)k_{ISP} \left( \frac{[Fe^{2+}][HS^-]}{[H^+]K_{FeS}^{SP}} - 1 \right)^{n_{ISP}}$                                                                                |
| R14 Iron sulphide dissolution                          | $(1-\varphi)k_{ISD} [FeS] \left( 1 - \frac{[Fe^{2+}][HS^-]}{[H^+]K_{FeS}^{SP}} \right)^{n_{ISD}}$                                                                          |
| R15 Manganese carbonate precipitation                  | $(1-\varphi)k_{MCP} \left( \frac{[Mn^{2+}][HCO_3^-]}{[H^+]K_{MnCO_3}^{SP}} - 1 \right)^{n_{MCP}}$                                                                          |
| R15 Manganese carbonate dissolution                    | $(1-\varphi)k_{MCD} [MnCO_3] \left( 1 - \frac{[Mn^{2+}][HCO_3^-]}{[H^+]K_{MnCO_3}^{SP}} \right)^{n_{MCD}}$                                                                 |

324 **Table S3 List of kinetic rate expressions for the reactions included in the reactive transport model. All expressions**  
325 **are based on standard kinetic formulations used in sediment biogeochemical models (see text for details). The values**  
326 **of the kinetic constants are listed in Table S4. Only the full expressions for mineralisation of slow degradable organic**  
327 **matter are given, expressions for fast degradable are identical.**  
328

| Constant                                           | Symbol              | Unit                                                | Value                | Reference |
|----------------------------------------------------|---------------------|-----------------------------------------------------|----------------------|-----------|
| <i>Organic matter reduction</i>                    |                     |                                                     |                      |           |
| Decay constant fast degradable organic matter      | $k_f$               | yr <sup>-1</sup>                                    | 10                   | a         |
| Decay constant slow degradable organic matter      | $k_s$               | yr <sup>-1</sup>                                    | 0.1                  | b         |
| Monod constant oxygen consumption                  | $K_{O_2}$           | μmol cm <sup>-3</sup>                               | 0.001                | c,d       |
| Monod constant manganese reduction                 | $K_{MnO_2}$         | μmol cm <sup>-3</sup>                               | 2.6                  | e         |
| Monod constant dissimilatory iron reduction        | $K_{FeOOH}$         | μmol cm <sup>-3</sup>                               | 10.4                 | e         |
| Monod constant sulphate reduction                  | $K_{SO_4^{2-}}$     | μmol cm <sup>-3</sup>                               | 0.9                  | d         |
| <i>Oxidation reactions</i>                         |                     |                                                     |                      |           |
| Ferrous iron oxidation                             | $k_{FIO}$           | μmol <sup>-1</sup> cm <sup>3</sup> yr <sup>-1</sup> | 10 <sup>+7</sup>     | d         |
| Sorbed ferrous iron oxidation                      | $k_{SIO}$           | μmol <sup>-1</sup> cm <sup>3</sup> yr <sup>-1</sup> | 10 <sup>+7</sup>     | f         |
| Canonical sulphide oxidation                       | $k_{CSO}$           | μmol <sup>-1</sup> cm <sup>3</sup> yr <sup>-1</sup> | 10 <sup>+7</sup>     | d         |
| Sulphide-mediated iron reduction (oxyhydr)oxides   | $k_{SIR}$           | μmol <sup>-1</sup> cm <sup>3</sup> yr <sup>-1</sup> | 494                  | g         |
| Aerobic methane oxidation                          | $k_{ArMO}$          | μmol <sup>-1</sup> cm <sup>3</sup> yr <sup>-1</sup> | 10 <sup>+4</sup>     | e         |
| Fe mediated methane oxidation                      | $k_{Fe-AMO}$        | μmol <sup>-1</sup> cm <sup>3</sup> yr <sup>-1</sup> | 10 <sup>+4</sup>     | -         |
| Sulphate mediated methane oxidation                | $k_{S-AMO}$         | μmol <sup>-1</sup> cm <sup>3</sup> yr <sup>-1</sup> | 10                   | e         |
| <i>precipitation reactions</i>                     |                     |                                                     |                      |           |
| Iron sulphide precipitation                        | $k_{ISP}$           | μmol <sup>-1</sup> cm <sup>3</sup> yr <sup>-1</sup> | 10 <sup>+4</sup>     | d         |
| Iron sulphide dissolution                          | $k_{ISD}$           | yr <sup>-1</sup>                                    | 3                    | d         |
| Kinetic exponent iron sulphide precipitation       | $n_{ISP}$           | -                                                   | 1                    | d         |
| Kinetic exponent iron sulphide dissolution         | $n_{ISD}$           | -                                                   | 1                    | d         |
| Manganese carbonate precipitation                  | $k_{MCP}$           | μmol <sup>-1</sup> cm <sup>3</sup> yr <sup>-1</sup> | 0.5*10 <sup>-5</sup> | e         |
| Manganese carbonate dissolution                    | $k_{MCD}$           | yr <sup>-1</sup>                                    | 0                    | e         |
| Kinetic exponent Manganese carbonate precipitation | $n_{ISP}$           | -                                                   | 1                    | e         |
| Kinetic exponent Manganese carbonate dissolution   | $n_{MCD}$           | -                                                   | 1                    | e         |
| <i>Saturation constants</i>                        |                     |                                                     |                      |           |
| Equilibrium constant ammonium sorption             | $K_{ads}^{NH_4^+}$  | cm <sup>3</sup> g <sup>-1</sup>                     | 1.75                 | -         |
| Equilibrium constant manganese sorption            | $K_{ads}^{Mn^{2+}}$ | cm <sup>3</sup> g <sup>-1</sup>                     | 30                   | h         |
| Equilibrium constant ferrous iron sorption         | $K_{ads}^{Fe^{2+}}$ | cm <sup>3</sup> g <sup>-1</sup>                     | 696                  | h         |
| Saturation constant iron sulphide                  | $K_{FeS}^{SP}$      | μmol cm <sup>-3</sup>                               | 3160                 | i         |
| Saturation constant manganese carbonate            | $K_{MnCO_3}^{SP}$   | μmol cm <sup>-3</sup>                               | 10 <sup>-5</sup>     | e         |

329 **Table S4 Parameter values for the kinetic constants included in the steady-state simulation of the reactive transport**  
330 **model. All parameters are expressed per bulk volume of sediment. References: a: (Katsev et al. 2006); b: (Fossing et**  
331 **al. 2004); c: (Van Cappellen and Wang 1996); d: (Meysman et al. 2015); e: (Meysman et al. 2003); f: (van de Velde**  
332 **and Meysman, 2016); g: (Poulton et al. 2004); h: (Berg et al. 2003); i: (Rickard 2006).**  
333

| Parameter                | Depth profile |             | Symbol                                 | Unit                | Value |
|--------------------------|---------------|-------------|----------------------------------------|---------------------|-------|
| Salinity                 | Constant      |             | $S$                                    | -                   | 33    |
| Temperature              | Constant      |             | $T_C$                                  | °C                  | 20    |
| Pressure                 | Constant      |             | $P$                                    | bar                 | 1.013 |
| pH                       | Constant      |             | $pH$                                   | -                   | 7.5   |
| Porosity                 | Constant      |             | $\varphi$                              | -                   | 0.75  |
| Solid phase density      | Constant      |             | $\rho_{sed}$                           | g cm <sup>-3</sup>  | 2.6   |
| Sedimentation velocity   | Constant      | porewater   | $v$                                    | cm yr <sup>-1</sup> | 0.2   |
|                          |               | solid phase | $w$                                    | cm yr <sup>-1</sup> | 0.2   |
| C:N ratio organic carbon | Constant      |             | $R_{CN}$                               | -                   | 5     |
| Species                  | UBC           | Type        | Unit                                   | Value               |       |
| $FeOOH$                  | FF            | Solid       | $\mu\text{mol cm}^{-2} \text{yr}^{-1}$ | 0                   |       |
| $MnO_2$                  | FF            | Solid       | $\mu\text{mol cm}^{-2} \text{yr}^{-1}$ | 0                   |       |
| $FeS$                    | FF            | Solid       | $\mu\text{mol cm}^{-2} \text{yr}^{-1}$ | 0                   |       |
| $MnCO_3$                 | FF            | Solid       | $\mu\text{mol cm}^{-2} \text{yr}^{-1}$ | 0                   |       |
| $DIC$                    | FC            | solute      | $\mu\text{mol cm}^{-3}$                | 2.2                 |       |
| $NH_4^+$                 | FC            | solute      | $\mu\text{mol cm}^{-3}$                | 0                   |       |
| $O_2$                    | FC            | solute      | $\mu\text{mol cm}^{-3}$                | 0.28                |       |
| $SO_4^{2-}$              | FC            | solute      | $\mu\text{mol cm}^{-3}$                | 26.6                |       |
| $Mn^{2+}$                | FC            | solute      | $\mu\text{mol cm}^{-3}$                | 0                   |       |
| $Fe^{2+}$                | FC            | solute      | $\mu\text{mol cm}^{-3}$                | 0                   |       |
| $HS^-$                   | FC            | solute      | $\mu\text{mol cm}^{-3}$                | 0                   |       |
| $CH_4$                   | FC            | solute      | $\mu\text{mol cm}^{-3}$                | 0                   |       |

334 **Table S5 List of parameters and boundary conditions included in the reactive transport model. UBC= upper**  
335 **boundary condition, FF= fixed flux, FC= fixed concentration. All lower boundary conditions were set at no gradient.**  
336



| analyte           | Unit                 | depth (cm) | May-14 |      | Jun-14 |      | Jul-14 |       | Sep-14 |      |
|-------------------|----------------------|------------|--------|------|--------|------|--------|-------|--------|------|
|                   |                      |            | mean   | s.d. | mean   | s.d. | mean   | s.d.  | mean   | s.d. |
| POC               | m-%                  | 0 - 5      | 1.6    | 0.6  | 2.3    | 0.3  | 1.1    | 0.7   | 1.9    | 0.5  |
|                   |                      | 5 - 10     | 1.9    | 0.2  | 2.3    | 0.1  | 1.8    | 0.9   | 1.9    | 0.2  |
|                   |                      | 10 - 15    | 1.4    | 0.5  | 1.8    | 0.4  | 1.98   | 0.09  | 1.69   | 0.08 |
|                   |                      | 15 - 20    | NA     | NA   | 1.9    | 0.2  | 1.9    | 1.2   | NA     | NA   |
|                   |                      | 20 - 25    | NA     | NA   | 1.5    | 0.6  | NA     | NA    | NA     | NA   |
| PIC               | m-%                  | 0 - 5      | 3.3    | 0.65 | 3.6    | 0.25 | 3.5    | 0.7   | 3.2    | 0.7  |
|                   |                      | 5 - 10     | 3.2    | 0.3  | 3.6    | 0.1  | 3.5    | 0.8   | 3.2    | 0.25 |
|                   |                      | 10 - 15    | 3.1    | 0.7  | 3.3    | 0.5  | 3.12   | 0.145 | 3.31   | 0.19 |
|                   |                      | 15 - 20    | NA     | NA   | 3.3    | 0.25 | 3.1    | 0.65  | NA     | NA   |
|                   |                      | 20 - 25    | NA     | NA   | 3.1    | 0.9  | NA     | NA    | NA     | NA   |
| PN                | m-%                  | 0 - 5      | 0.23   | 0.08 | 0.34   | 0.04 | 0.2    | 0.1   | 0.28   | 0.07 |
|                   |                      | 5 - 10     | 0.26   | 0.03 | 0.34   | 0.02 | 0.3    | 0.1   | 0.28   | 0.03 |
|                   |                      | 10 - 15    | 0.20   | 0.07 | 0.25   | 0.06 | 0.28   | 0.03  | 0.24   | 0.03 |
|                   |                      | 15 - 20    | NA     | NA   | 0.25   | 0.02 | 0.25   | 0.02  | NA     | NA   |
|                   |                      | 20 - 25    | NA     | NA   | 0.20   | 0.08 | NA     | NA    | NA     | NA   |
| Fe <sub>tot</sub> | mmol g <sup>-1</sup> | 0 - 5      | 0.41   | 0.07 | 0.51   | 0.03 | 0.31   | 0.07  | NA     | NA   |
|                   |                      | 5 - 10     | 0.43   | 0.04 | 0.55   | 0.02 | 0.35   | 0.08  | NA     | NA   |
|                   |                      | 10 - 15    | 0.42   | 0.02 | 0.49   | 0.06 | 0.33   | 0.03  | NA     | NA   |
|                   |                      | 15 - 20    | NA     | NA   | 0.42   | 0.04 | 0.32   | 0.02  | NA     | NA   |
|                   |                      | 20 - 25    | NA     | NA   | 0.39   | 0.07 | NA     | NA    | NA     | NA   |
| Mn <sub>tot</sub> | μmol g <sup>-1</sup> | 0 - 5      | 9      | 1    | 14     | 1    | 8      | 2     | NA     | NA   |
|                   |                      | 5 - 10     | 10.3   | 0.6  | 13.6   | 0.3  | 10     | 3     | NA     | NA   |
|                   |                      | 10 - 15    | 9.9    | 0.4  | 12     | 2    | 9.5    | 0.9   | NA     | NA   |
|                   |                      | 15 - 20    | NA     | NA   | 10.0   | 0.4  | 9.2    | 0.3   | NA     | NA   |
|                   |                      | 20 - 25    | NA     | NA   | 9      | 1    | NA     | NA    | NA     | NA   |

**Table S6 average elemental composition per 5 cm for particulate organic carbon (POC), particulate inorganic carbon (PIC), particulate nitrogen (PN), total aqua regia extractable iron (Fetot) and total aqua regia extractable manganese (Mntot). Mean is the average of two replicate cores and all measurements within that interval (see text for slicing depths), s.d. is the standard deviation of those measurements.**

337  
338  
339  
340  
341

|                | average concentration in dredged sediment |        | depth (cm) | May-14 |        | Jun-14  |         | Jul-14 |        | Sep-14 |        |
|----------------|-------------------------------------------|--------|------------|--------|--------|---------|---------|--------|--------|--------|--------|
|                | 1990                                      | 2000   |            | mean   | s.d.   | mean    | s.d.    | mean   | s.d.   | mean   | s.d.   |
| As<br>μmol g-1 | 0.17                                      | 0.22   | 0 - 5      | 0.21   | 0.05   | 0.26    | 0.02    | 0.18   | 0.04   | 0.22   | 0.02   |
|                |                                           |        | 5 - 10     | 0.23   | 0.02   | 0.274   | 0.007   | 0.20   | 0.04   | 0.29   | 0.03   |
|                |                                           |        | 10 - 15    | 0.23   | 0.01   | 0.25    | 0.03    | 0.23   | 0.06   | 0.29   | NA*    |
|                |                                           |        | 15 - 20    | NA     | NA     | 0.22    | 0.02    | 0.18   | 0.03   | NA     | NA     |
|                |                                           |        | 20 - 25    | NA     | NA     | 0.21    | 0.03    | NA     | NA     | NA     | NA     |
| Cd<br>μmol g-1 | 0.0217                                    | 0.0050 | 0 - 5      | 0.0030 | 0.0005 | 0.0031  | 0.0002  | 0.0028 | 0.0006 | 0.0023 | 0.0006 |
|                |                                           |        | 5 - 10     | 0.0032 | 0.0002 | 0.00319 | 0.00008 | 0.0030 | 0.0007 | 0.0033 | 0.0003 |
|                |                                           |        | 10 - 15    | 0.0035 | 0.0004 | 0.0031  | 0.0002  | 0.0033 | 0.0001 | 0.0034 | 0.0002 |
|                |                                           |        | 15 - 20    | NA     | NA     | 0.0032  | 0.0003  | 0.0032 | 0.0007 | NA     | NA     |
|                |                                           |        | 20 - 25    | NA     | NA     | 0.0032  | 0.0006  | NA     | NA     | NA     | NA     |
| Cr<br>μmol g-1 | 1.00                                      | 1.13   | 0 - 5      | 1.1    | 0.2    | 1.4     | 0.1     | 1.1    | 0.3    | 1.0    | 0.2    |
|                |                                           |        | 5 - 10     | 1.1    | 0.1    | 1.54    | 0.07    | 1.2    | 0.4    | 1.2    | 0.1    |
|                |                                           |        | 10 - 15    | 1.10   | 0.09   | 1.4     | 0.2     | 1.18   | 0.09   | 1.09   | 0.05   |
|                |                                           |        | 15 - 20    | NA     | NA     | 1.1     | 0.1     | 1.0    | 0.1    | NA     | NA     |
|                |                                           |        | 20 - 25    | NA     | NA     | 1.0     | 0.2     | NA     | NA     | NA     | NA     |
| Cu<br>μmol g-1 | 0.43                                      | 0.36   | 0 - 5      | 0.20   | 0.05   | 0.26    | 0.03    | 0.20   | 0.06   | 0.19   | 0.06   |
|                |                                           |        | 5 - 10     | 0.20   | 0.02   | 0.27    | 0.01    | 0.21   | 0.08   | 0.22   | 0.03   |
|                |                                           |        | 10 - 15    | 0.21   | 0.01   | 0.24    | 0.02    | 0.23   | 0.01   | 0.208  | 0.007  |
|                |                                           |        | 15 - 20    | NA     | NA     | 0.21    | 0.02    | 0.20   | 0.02   | NA     | NA     |
|                |                                           |        | 20 - 25    | NA     | NA     | 0.18    | 0.04    | NA     | NA     | NA     | NA     |
| Pb<br>μmol g-1 | 0.31                                      | 0.19   | 0 - 5      | 0.21   | 0.04   | 0.25    | 0.02    | 0.16   | 0.04   | 0.14   | 0.03   |
|                |                                           |        | 5 - 10     | 0.22   | 0.03   | 0.27    | 0.02    | 0.17   | 0.05   | 0.19   | 0.02   |
|                |                                           |        | 10 - 15    | 0.21   | 0.01   | 0.24    | 0.01    | 0.190  | 0.006  | 0.179  | 0.006  |
|                |                                           |        | 15 - 20    | NA     | NA     | 0.22    | 0.03    | 0.16   | 0.02   | NA     | NA     |
|                |                                           |        | 20 - 25    | NA     | NA     | 0.19    | 0.04    | NA     | NA     | NA     | NA     |
| Ni<br>μmol g-1 | 0.35                                      | 0.31   | 0 - 5      | 0.33   | 0.06   | 0.42    | 0.03    | 0.33   | 0.08   | 0.32   | 0.08   |
|                |                                           |        | 5 - 10     | 0.33   | 0.02   | 0.44    | 0.02    | 0.35   | 0.12   | 0.36   | 0.04   |
|                |                                           |        | 10 - 15    | 0.32   | 0.01   | 0.40    | 0.05    | 0.36   | 0.03   | 0.33   | 0.01   |

|                            |      |      |         |      |      |      |      |      |      |      |      |
|----------------------------|------|------|---------|------|------|------|------|------|------|------|------|
| Zn<br>μmol g <sup>-1</sup> | 2.31 | 2.10 | 15 - 20 | NA   | NA   | 0.34 | 0.05 | 0.32 | 0.03 | NA   | NA   |
|                            |      |      | 20 - 25 | NA   | NA   | 0.29 | 0.05 | NA   | NA   | NA   | NA   |
|                            |      |      | 0 - 5   | 1.5  | 0.3  | 1.8  | 0.1  | 1.6  | 0.4  | 1.8  | 0.6  |
|                            |      |      | 5 - 10  | 1.6  | 0.1  | 1.88 | 0.09 | 1.7  | 0.5  | 2.0  | 0.2  |
|                            |      |      | 10 - 15 | 1.61 | 0.06 | 1.7  | 0.1  | 1.9  | 0.1  | 1.95 | 0.05 |
|                            |      |      | 15 - 20 | NA   | NA   | 1.6  | 0.1  | 1.7  | 0.2  | NA   | NA   |
|                            |      |      | 20 - 25 | NA   | NA   | 1.5  | 0.3  | NA   | NA   | NA   | NA   |

342 **Table S7 Overview of the average aqua regia extractable trace metal content of the sediment cores. The trace metal content of dredged sediment from the Oostende harbour from**  
343 **measurements in 1990 and 2000 (<http://www.mumm.ac.be/NL/Management/Sea-based/dredging.php>) are given as reference. Mean is the average of two replicate cores and all**  
344 **measurements within that interval (see text for slicing depths), s.d. is the standard deviation of those measurements. NA values means no value could be given because the cores did**  
345 **not go deep enough.**  
346 **\*for September only 1 core was measured for As, and only 1 measurement was within the 10 – 15 cm range, thus no standard deviation could be given.**

|                   | month         | depth |
|-------------------|---------------|-------|
| POC               | 0.15          | 0.21  |
| PIC               | <b>'0.03'</b> | 0.07  |
| PN                | 0.21          | 0.21  |
| Fe <sub>tot</sub> | 0.08          | 0.40  |
| Mn <sub>tot</sub> | 0.21          | 0.53  |
| Cd                | 0.60          | 0.26  |
| Cr                | 0.10          | 0.35  |
| Cu                | 0.27          | 0.51  |
| Ni                | 0.20          | 0.74  |
| Pb                | <b>'0.02'</b> | 0.35  |
| Zn                | 0.34          | 0.38  |
| As*               | <b>'0.01'</b> | 0.35  |

347 Table S8 p-values for the two-way ANOVA, testing for month (first column) and depth zone (second column) as  
348 factors. Significant factors ( $p < 0.05$ ) are indicated by quotation marks and in bold font.

349 \* for As only May, June and July were included in the ANOVA test, due to lacking duplicate in September.

350

351 **References**

- 352 1. Nieuwenhuize, J., Maas, Y. E. M. & Middelburg, J. J. Rapid analysis of organic carbon  
353 and nitrogen in particulate materials. *Mar. Chem.* **45**, 217–224 (1994).
- 354 2. van de Velde, S. & Meysman, F. J. R. The influence of bioturbation on iron and  
355 sulphur cycling in marine sediments: a model analysis. *Aquat. Geochemistry* **22**, 469–  
356 504 (2016).
- 357 3. Boudreau, B. P. *Diagenetic Models and their Implementation*. (Springer-Verlag Berlin  
358 Heidelberg New York, 1997).
- 359 4. Meysman, F. J. R., Boudreau, B. P. & Middelburg, J. J. Modeling reactive transport in  
360 sediments subject to bioturbation and compaction. *Geochim. Cosmochim. Acta* **69**,  
361 3601–3617 (2005).
- 362 5. Fick, A. Uber Diffusion. *Ann. Phys. (N. Y.)* **94**, 59–86 (1855).
- 363 6. van de Velde, S., Callebaut, I., Gao, Y. & Meysman, F. J. R. Impact of electrogenic  
364 sulfur oxidation on trace metal cycling in a coastal sediment. *Chem. Geol.* **452**, 9–23  
365 (2017).
- 366 7. van de Velde, S. *et al.* The impact of electrogenic sulfur oxidation on the  
367 biogeochemistry of coastal sediments: a field study. *Geochim. Cosmochim. Acta* **194**,  
368 211–232 (2016).
- 369 8. Soetaert, K. & Meysman, F. Reactive transport in aquatic ecosystems: Rapid model  
370 prototyping in the open source software R. *Environ. Model. Softw.* **32**, 49–60 (2012).
- 371 9. Boudreau, B. P. A method-of-lines code for carbon and nutrient diagenesis in aquatic  
372 sediments. *Comput. Geosci.* **22**, 479–496 (1996).
- 373 10. Soetaert, K., Petzoldt, T. & Setzer, R. W. Package deSolve : Solving Initial Value  
374 Differential Equations in R. *J. Stat. Softw.* **33**, 1–25 (2010).
- 375 11. Thamdrup, B. in *Advances in Microbial Ecology* (ed. Schink, B.) 41–84 (Luwer  
376 Academic/Plenum Publishers, 2000).
- 377 12. Lohse, L., Malschaert, J. F. P., Slomp, C. P., Helder, W. & Vanraaphorst, W. Nitrogen  
378 cycling in North Sea sediments - Interaction of denitrification and nitrification in  
379 offshore and coastal areas. *Mar. Ecol. Prog. Ser.* **101**, 283–296 (1993).
- 380 13. Soetaert, K., Herman, P. M. J. & Middelburg, J. J. A model of early diagenetic  
381 processes from the shelf To abyssal depths. *Geochim. Cosmochim. Acta* **60**, 1019–1040  
382 (1996).
- 383 14. Postma, D. & Jakobsen, R. Redox zonation: Equilibrium constraints on the

- 384 Fe(III)/SO<sub>4</sub>-reduction interface. *Geochim. Cosmochim. Acta* **60**, 3169–3175 (1996).
- 385 15. Mackin, J. E. & Aller, R. C. Ammonium adsorption in marine sediments. *Limnol.*  
386 *Oceanogr.* **29**, 250–257 (1984).
- 387 16. Berg, P., Rysgaard, S. & Thamdrup, B. Dynamic Modeling of Early Diagenesis and  
388 Nutrient Cycling. A Case Study in an Arctic Marine Sediment. *Am. J. Sci.* **303**, 905–955  
389 (2003).
- 390 17. Meysman, F. J. R., Middelburg, J. J., Herman, P. M. J. & Heip, C. H. R. Reactive  
391 transport in surface sediments. II. Media: an object-oriented problem-solving  
392 environment for early diagenesis. *Comput. Geosci.* **29**, 301–318 (2003).
- 393 18. Thamdrup, B., Fossing, H. & Jorgensen, B. B. Manganese, iron, and sulfur cycling in  
394 a coastal marine sediment, Aarhus Bay, Denmark. *Geochim. Cosmochim. Acta* **58**,  
395 5115–5129 (1994).
- 396 19. Van Cappellen, P. & Wang, Y. Cycling of iron and manganese in surface sediments: a  
397 general theory for the coupled transport and reaction of carbon, oxygen, nitrogen,  
398 sulfur, iron, and manganese. *Am. J. Sci.* **296**, 197–243 (1996).
- 399 20. Fossing, H. *et al.* A model set-up for an oxygen and nutrient flux model for Aarhus Bay  
400 (Denmark). (2004).
- 401 21. Katsev, S., Sundby, B. & Mucci, A. Modelling vertical excursions of the redox  
402 boundary in sediments: Application to deep basins of the Arctic Ocean. *Limnol.*  
403 *Oceanogr.* **51**, 1581–1593 (2006).
- 404 22. Meysman, F. J. R., Risgaard-Petersen, N., Malkin, S. Y. & Nielsen, L. P. The  
405 geochemical fingerprint of microbial long-distance electron transport in the seafloor.  
406 *Geochim. Cosmochim. Acta* **152**, 122–142 (2015).
- 407 23. Poulton, S. W., Krom, M. D. & Raiswell, R. A revised scheme for the reactivity of iron  
408 (oxyhydr)oxide minerals towards dissolved sulfide. *Geochim. Cosmochim. Acta* **68**,  
409 3703–3715 (2004).
- 410 24. Rickard, D. The solubility of FeS. *Geochim. Cosmochim. Acta* **70**, 5779–5789 (2006).
- 411 25. Vasquez-Cardenas, D. *et al.* Microbial carbon metabolism associated with electrogenic  
412 sulphur oxidation in coastal sediments. *ISME J.* **9**, 1966–1978 (2015).
- 413 26. Risgaard-Petersen, N., Revil, A., Meister, P. & Nielsen, L. P. Sulfur, iron-, and calcium  
414 cycling associated with natural electric currents running through marine sediment.  
415 *Geochim. Cosmochim. Acta* **92**, 1–13 (2012).
- 416 27. Greenwood, N. N. & Earnshaw, A. *Chemistry of the Elements*. (Oxford: Pergamon  
417 Press, 1984).
